# Supplementary material for: Ab initio characterization of N doped T-graphene and its application as an anode material for Na ion rechargeable batteries
Source: Royal Society of Chemistry journal article supplement (doi:10.1039/d1se00657f), 2021-01-01
Supplement: d1se00657f1.pdf [file d1se00657f1.pdf]

## *Ab Initio* characterization of N doped T-graphene and its application as anode material for Na ion rechargeable batteries

Neha Yadav and T. J. Dhillip Kumar\*

Quantum Dynamics Lab, Department of Chemistry, Indian Institute of Technology Ropar, Rupnagar 140001, India

**S1:** The plot of the energy vs cut-off value for the optimization of  $E_{\text{cut}}$  is as follows:

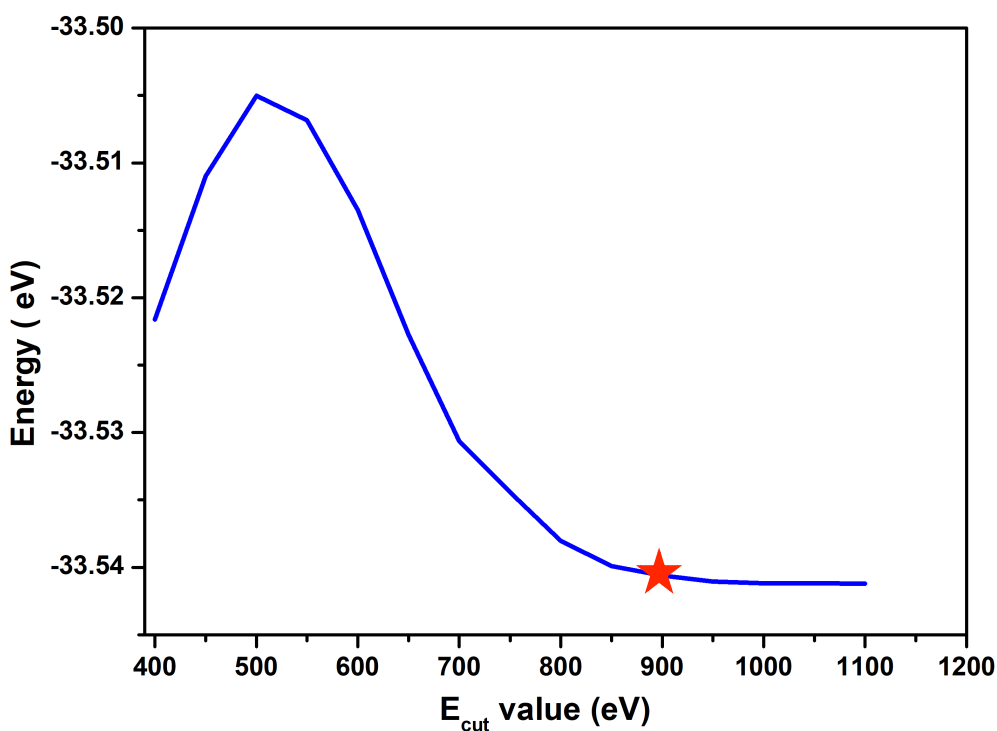

Figure S1: The energy vs cut-off value plot for  $E_{\text{cut}}$  optimization.

**S2:** For the thermodynamic feasibility of N doped T-graphene, N doping energy of N doped T-graphene has been computed using the formula:

$$\text{N doping energy} = \text{Energy of N doped T-graphene} + \text{Energy of C atoms} - \text{Energy of T-graphene} - \text{Energy of N atoms}$$

The N doping energy is obtained as -13.154 eV and it validates the effective doping of N in the T-graphene lattice.

**S3:** T-graphene has also been explored for anode material in alkali ion batteries. The comparison of the results of T-graphene and N doped T-graphene are included in the table below:

|                    | Adsorption Energy (eV) | Diffusion barrier (eV) | Storage Capacity (mAhg <sup>-1</sup> ) |
|--------------------|------------------------|------------------------|----------------------------------------|
| T-graphene [1]     | -1.26                  | 0.35                   | 2232                                   |
| N doped T-graphene | -0.21                  | 0.59                   | 754/2140                               |

For the calculation of storage capacity, the formula being used is:

$$C = \frac{enF}{M_f}$$

where  $e$  is electronic charge,  $n$  is the number of atoms adsorbed,  $F$  is Faraday's constant and  $M_f$  is the mass of the formula unit.

While calculating the theoretical capacity of T-graphene, the authors from Ref. [1] have taken the mass of formula unit ( $M_f$ ) corresponding to the stoichiometry Na<sub>6</sub>C<sub>6</sub> as mass of C<sub>6</sub>. Thus, the value of theoretical capacity is reported as 2232 mAhg<sup>-1</sup>.

We have calculated the theoretical capacity by considering the mass of formula unit as the mass of Na<sub>4</sub>C<sub>3</sub>N. Therefore, we got the capacity as 754 mAhg<sup>-1</sup>.

If we compute the capacity taking the mass of the formula unit as the mass of C<sub>3</sub>N, then our capacity is 2140 mAhg<sup>-1</sup> which is similar to that calculated for T-graphene.

Therefore, the difference in the value of capacities while comparing them is due to the difference in the stoichiometry considered for the formula unit.

[1] J. Hu, Y. Liu, N. Liu, J. Li and C. Ouyang, *Phys. Chem. Chem. Phys.*, 2020, **22**, 3281-3289.
